# Supplementary material for: Ketogenic Diet Applied in Weight Reduction of Overweight and Obese Individuals with Progress Prediction by Use of the Modified Wishnofsky Equation
Source: MDPI journal article supplement (doi:10.3390/nu15040927), 2023-02-12
Supplement: s1 [file s1]

**Table S1.** Average energy and nutrient content of the 5<sup>th</sup> phase of the ketogenic diet.

| <b>observed</b>                | <b>Amount</b>          |
|--------------------------------|------------------------|
| Energy (kcal/kJ)               | 1500 / 6280 ± 50 / 210 |
| Protein (g) <sup>1</sup>       | 136 ± 5.6              |
| Carbohydrates (g) <sup>1</sup> | 18.4 ± 1.1             |
| Fats (g) <sup>1</sup>          | 95 ± 4.3               |
| Magnesium (mg)                 | 360 ± 1.9              |
| Sodium (mg)                    | 1200 ± 44.2            |
| Potassium (mg)                 | 1200 ± 48.3            |
| Calcium (mg)                   | 360 ± 17.8             |
| Magnesium (mg)                 | 200 ± 15.5             |
| Vitamin C (mg)                 | 60 ± 2.7               |
| Niacin (mg NE)                 | 18 ± 0.8               |
| Vitamin E (mg)                 | 7.4 ± 0.4              |
| Pantothenic acid (mg)          | 6 ± 0.3                |
| Zinc (mg)                      | 10 ± 0.9               |
| Iron (mg)                      | 8 ± 2.1                |
| Vitamin B <sub>6</sub> (mg)    | 2 ± 0.08               |
| Riboflavin (mg)                | 1.6 ± 0.03             |
| Thiamine (mg)                  | 1.4 ± 0.02             |
| Copper (mg)                    | 1 ± 0.01               |
| Manganese (mg)                 | 1 ± 0.03               |
| Vitamin A (µg RE)              | 800 ± 32.7             |
| Folic acid (µg)                | 200 ± 10.4             |
| Biotin (µg)                    | 150 ± 6.2              |
| Iodine (µg)                    | 100 ± 4.2              |
| Vitamin K (µg)                 | 30 ± 1,1               |
| Chromium (µg)                  | 25 ± 0.9               |
| Molybdenum (µg)                | 25 ± 1.1               |
| Selenium (µg)                  | 25 ± 1.3               |
| Vitamin D (µg)                 | 5 ± 0.25               |
| Vitamin B <sub>12</sub> (µg)   | 1 ± 0.2                |
| Omega-3 (mg)                   | 1000 ± 30              |

<sup>1</sup> share of the macronutrients followed the recommendations [23] (fats: proteins: carbohydrates = 60:35:5)

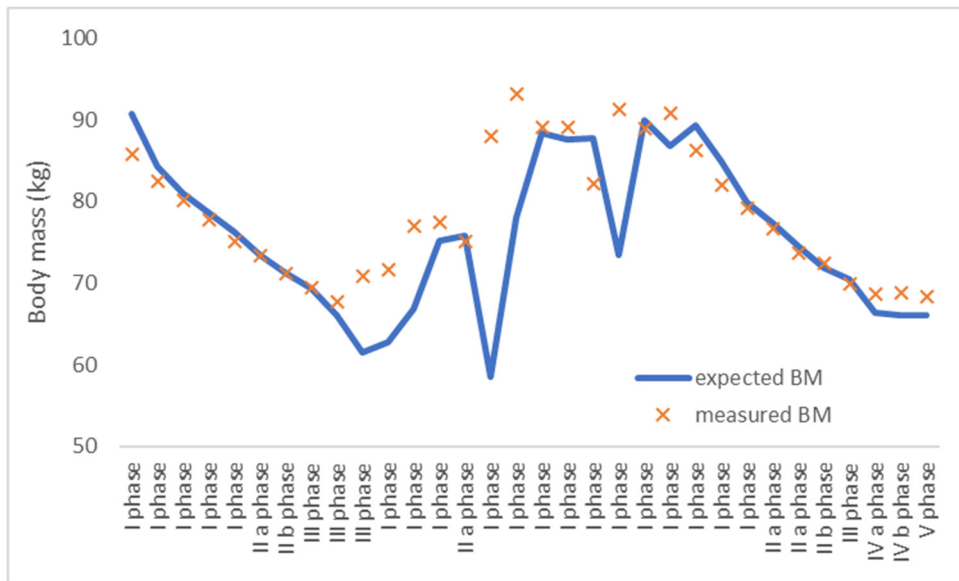

**Figure S1.** Trend of the expected body mass (BM) and measured body mass for a relapsed individual.
